# Supplementary material
Source: publisher figshare collection journal article supplement (https://karger.figshare.com/ndownloader/files/13457942)
Supplement: Supplementary file 1 [file 13457942]

## **Supplementary Material**

# **Proteome and Transcriptome Reveal Involvement of Heat Shock Proteins and Indoleacetic Acid Metabolism Process in Lentinula Edodes Thermotolerance**

Gang-Zheng Wang<sup>a,b</sup> Yi Luo<sup>a,b</sup> Chao-Jun Ma<sup>a,b</sup> Yan Zhou<sup>a,b</sup> Sha-Sha Zhou<sup>a,b</sup>  
Ying-Li Cai<sup>a,b</sup> Xiao-Long Ma<sup>a,b</sup> Jing-Jing Yu<sup>a,b</sup> Yin-Bing Bian<sup>a,b</sup> Yu-Hua Gong<sup>a,b</sup>

<sup>a</sup>Institute of Applied Mycology, College of Plant Science and Technology, Huazhong Agricultural University, Wuhan, <sup>b</sup>Key Laboratory of Agro-Microbial Resource Comprehensive Utilization, Ministry of Agriculture, Huazhong Agricultural University, Wuhan, China



Figure S2

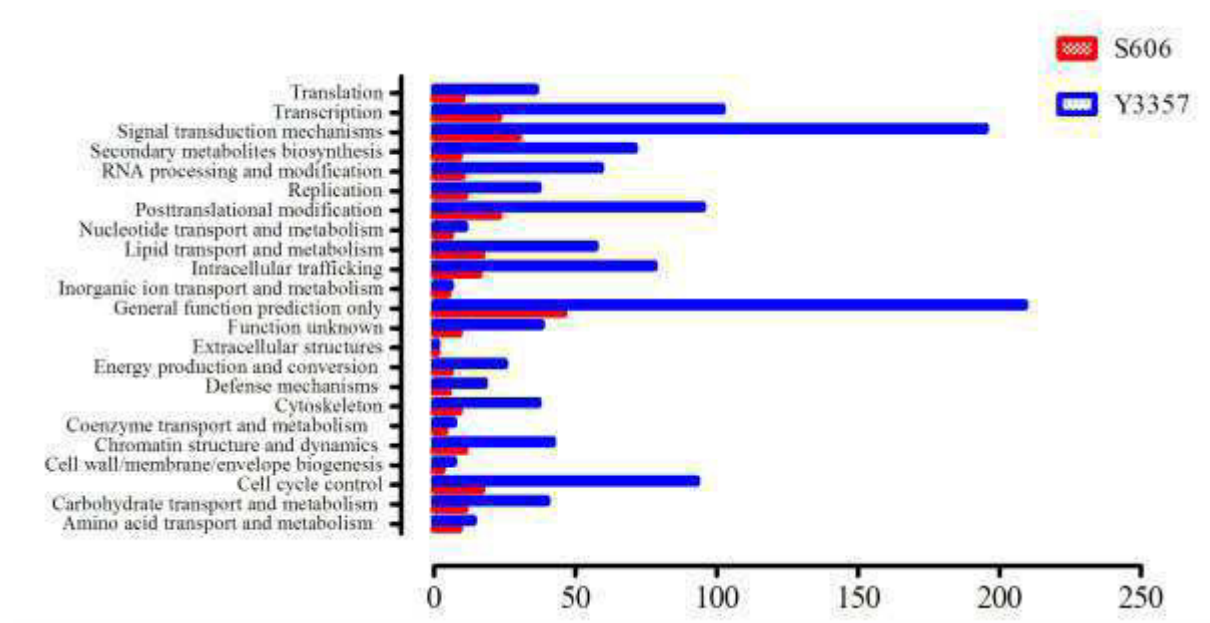

Fig. S2 KOG analysis of different expression genes before and after heat stress for two *L. edodes* strains. Y3357, YS3357.

Figure S3

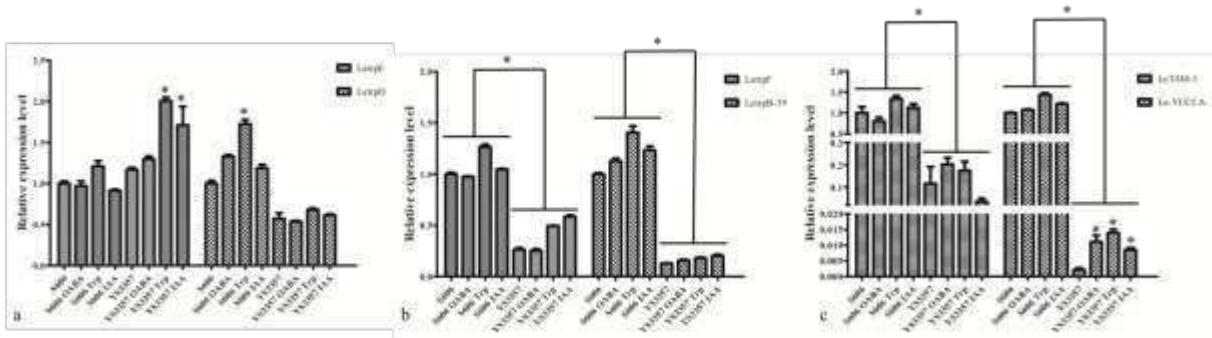

Fig. S3 qRT-PCR analysis of the genes related to tryptophan and IAA biosynthesis with or without exogenous tryptophan, OABA and IAA. \*\* indicates the significant difference.
